# Supplementary material
Source: PubMed Central journal article supplement (PMC7413237)
Supplement: jnm236000SupplementaryData.pdf [file jnm236000SupplementaryData.pdf]

**Supplemental Table 1.** Semiquantitative immuno-PET data for the 4 cohorts.

| Cohorts                           | Tumor SUV <sub>max</sub> |         | MBP SUV <sub>mean</sub> |         | Tumor-to-MBP ratio |         |
|-----------------------------------|--------------------------|---------|-------------------------|---------|--------------------|---------|
|                                   | 60 min                   | 120 min | 60 min                  | 120 min | 60 min             | 120 min |
| <b>I (TF2 120/24h/IMP 6/20)</b>   |                          |         |                         |         |                    |         |
| <b>Patient 1</b>                  | -                        | 3.52    | -                       | 0.79    | -                  | 4.46    |
| <b>Patient 2</b>                  | 7.55                     | 6.38    | 4.58                    | 1.78    | 1.65               | 3.58    |
| <b>Patient 3</b>                  | 27.89                    | 26.38   | 2.48                    | 2.13    | 11.25              | 12.38   |
| <b>Max</b>                        | 27.89                    | 26.38   | 4.58                    | 2.13    | 11.25              | 12.38   |
| <b>Min</b>                        | 7.55                     | 3.52    | 2.48                    | 0.79    | 1.65               | 3.58    |
| <b>Median</b>                     | 17.72                    | 6.38    | 3.53                    | 1.78    | 6.45               | 4.46    |
| <b>II (TF2 120/30h/IMP 6/20)</b>  |                          |         |                         |         |                    |         |
| <b>Patient 4</b>                  | 8.53                     | 7.72    | 1.59                    | 1.42    | 5.36               | 5.44    |
| <b>Patient 5</b>                  | 6.96                     | 9.53    | 4.69                    | 3.88    | 1.48               | 2.46    |
| <b>Patient 7</b>                  | 5.24                     | 4.59    | 1.80                    | 1.23    | 2.91               | 3.73    |
| <b>Patient 18</b>                 | 23.83                    | 34.44   | 3.84                    | 2.34    | 6.21               | 14.72   |
| <b>Patient 21a</b>                | 44.05                    | 47.89   | 0.80                    | 0.59    | 55.06              | 81.17   |
| <b>Patient 21b</b>                | 71.05                    | 65.04   | 2.26                    | 2.13    | 31.44              | 30.54   |
| <b>Patient 22</b>                 | 28.14                    | 34.21   | 6.39                    | 4.70    | 4.40               | 7.28    |
| <b>Patient 23</b>                 | 6.01                     | 10.24   | 7.07                    | 6.09    | 0.85               | 1.68    |
| <b>Max</b>                        | 71.05                    | 65.04   | 7.07                    | 6.09    | 55.06              | 81.17   |
| <b>Min</b>                        | 5.24                     | 4.59    | 0.80                    | 0.59    | 0.85               | 1.68    |
| <b>Median</b>                     | 16.18                    | 22.23   | 3.05                    | 2.24    | 4.88               | 6.36    |
| <b>III (TF2 120/30h/IMP 3/40)</b> |                          |         |                         |         |                    |         |
| <b>Patient 8</b>                  | 5.89                     | 6.89    | 6.16                    | 5.60    | 0.96               | 1.23    |
| <b>Patient 9</b>                  | 11.34                    | 21.80   | 0.74                    | 0.36    | 15.32              | 60.56   |
| <b>Patient 11</b>                 | 56.99                    | 61.57   | 1.87                    | 1.20    | 30.48              | 51.31   |
| <b>Patient 12</b>                 | 19.14                    | 25.24   | 3.60                    | 2.69    | 5.32               | 9.38    |
| <b>Patient 19a</b>                | 22.41                    | 14.62   | 0.60                    | 0.74    | 37.35              | 19.76   |
| <b>Patient 19b</b>                | 16.07                    | 17.60   | 0.72                    | 0.91    | 22.32              | 19.34   |
| <b>Patient 20</b>                 | 15.10                    | 14.68   | 0.62                    | 0.28    | 24.35              | 52.43   |
| <b>Max</b>                        | 22.41                    | 61.57   | 6.16                    | 5.60    | 37.35              | 60.56   |
| <b>Min</b>                        | 5.89                     | 6.89    | 0.60                    | 0.28    | 0.96               | 1.23    |
| <b>Median</b>                     | 16.07                    | 17.60   | 0.74                    | 0.91    | 22.32              | 19.76   |
| <b>IV (TF2 60/30h/IMP 3/20)</b>   |                          |         |                         |         |                    |         |
| <b>Patient 13</b>                 | 8.22                     | 12.07   | 1.64                    | 0.91    | 5.01               | 13.26   |
| <b>Patient 15</b>                 | 28.24                    | 28.74   | 4.56                    | 1.3     | 6.19               | 22.12   |
| <b>Patient 16</b>                 | 8.98                     | 8.27    | 1.72                    | 0.94    | 5.22               | 8.80    |
| <b>Patient 17</b>                 | 19.13                    | 16.34   | 3.77                    | 1.82    | 5.07               | 8.98    |
| <b>Max</b>                        | 28.24                    | 28.74   | 4.56                    | 1.82    | 6.19               | 22.12   |
| <b>Min</b>                        | 8.22                     | 8.27    | 1.64                    | 0.91    | 5.01               | 8.80    |
| <b>Median</b>                     | 14.06                    | 14.21   | 2.75                    | 1.12    | 5.15               | 11.12   |

MBP: Mediastinal Blood Pool; (TF2 dose nmol/Delay/<sup>68</sup>Ga-IMP288 nmol/molar dose ratio).
